# Supplementary material for: A designed lipopeptide with a leucine zipper as an imbedded on/off switch for lipid bilayers
Source: Royal Society of Chemistry journal article supplement (doi:10.1039/c6cp00378h), 2016-01-01
Supplement: c6cp00378h1.pdf [file c6cp00378h1.pdf]

## A designed lipopeptide with a leucine zipper as an imbedded on/off switch for lipid bilayer

Sijia Wang<sup>1</sup>, Yingxing Shen<sup>1</sup>, Junqi Zhang<sup>2</sup>, Shouhong Xu<sup>1\*</sup>, Honglai Liu<sup>1\*</sup>

### Corresponding Author

\*E-mail: [xushouhong@ecust.edu.cn](mailto:xushouhong@ecust.edu.cn).

\*E-mail: [hliu@ecust.edu.cn](mailto:hliu@ecust.edu.cn).

### Supporting Information

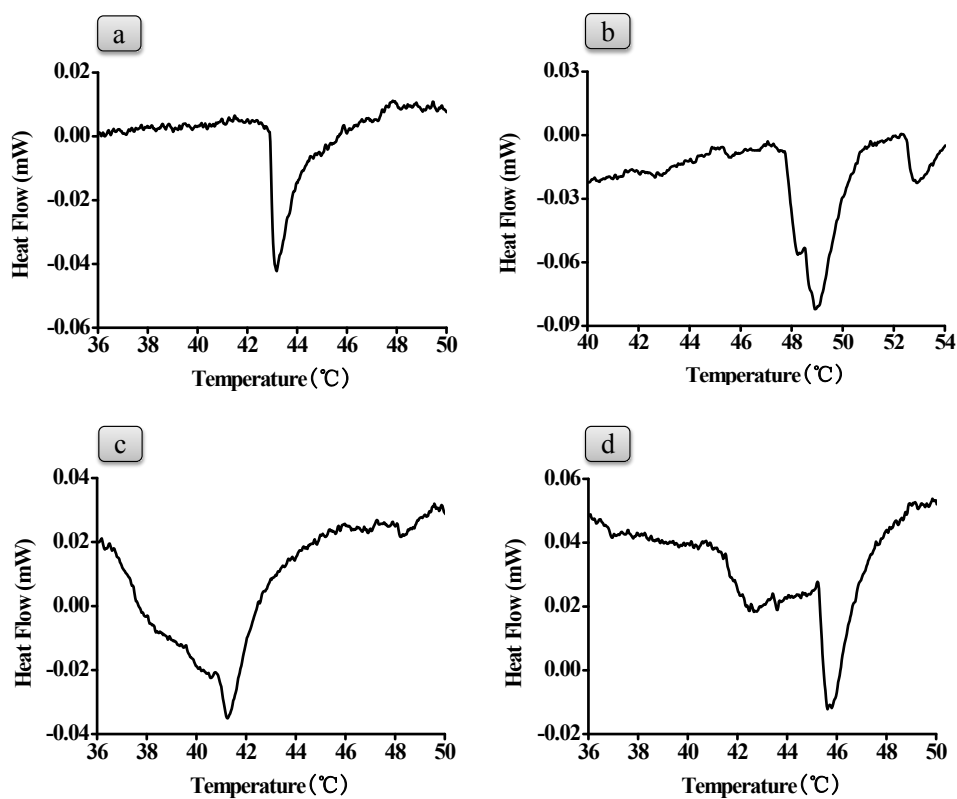

Fig. S1 Differential scanning calorimetry measurements of (a) Liposome1, (b) Lipo1-LPeIII, (c) Liposome2 and (d) Lipo2-LPeIII.
